## Reconstitution of an intact clock that generates circadian DNA binding in vitro

Archana G. Chavan<sup>1</sup>, Dustin C. Ernst<sup>2</sup>, Mingxu Fang<sup>2</sup>, Cigdem Sancar<sup>2</sup>, Carrie L. Partch<sup>2,3</sup>,  
5 Susan S. Golden<sup>2,4</sup>, Andy LiWang<sup>1,2,5,6,7,8\*</sup>

<sup>1</sup>School of Natural Sciences, University of California, Merced, CA 95343.

<sup>2</sup>Center for Circadian Biology, University of California, San Diego, La Jolla, CA 92093.

<sup>3</sup>Department of Chemistry & Biochemistry, University of California, Santa Cruz, CA 95064.

<sup>4</sup>Division of Biological Sciences, University of California, San Diego, La Jolla, CA 92093.

10 <sup>5</sup>Chemistry & Chemical Biology, University of California, Merced, CA 95343.

<sup>6</sup>Quantitative & Systems Biology, University of California, Merced, CA 95343.

<sup>7</sup>Center for Cellular and Biomolecular Machines, University of California, Merced, CA 95343.

<sup>8</sup>Health Sciences Research Institute, University of California, Merced, CA 95343.

15 \*Correspondence to: A.L. ([aliwang@ucmerced.edu](mailto:aliwang@ucmerced.edu))

## **Abstract:**

Circadian clocks control gene expression in the complex milieu of cells. Here, we reconstituted under defined conditions in vitro the cyanobacterial circadian clock system which includes an oscillator, signal-transduction pathways, transcription factor, and promoter DNA. The system oscillates autonomously with a near 24 h period, remains phase coherent for many days, and allows real-time observation of each component simultaneously without user intervention. This reassembled clock system provides new insights into how a circadian clock exerts control over gene expression and can serve in the area of synthetic biology as a new platform upon which to build even more complexity.

10

## **One Sentence Summary:**

An autonomously oscillating circadian clock-controlled gene regulatory circuit is studied in vitro using a real-time high-throughput assay.

## Main Text:

Endogenous circadian clocks provide organisms with an internal representation of local time (1), and the *Synechococcus elongatus* clock generates *bona fide* circadian rhythms of genetic, physiological, and metabolic activities that fulfill all criteria that define circadian clocks (2). The core circadian clock genes of cyanobacteria, *kaiA*, *kaiB*, and *kaiC*, are essential for rhythmic gene expression (3), and their proteins generate an autonomous ~24 h rhythm of KaiC phosphorylation in vivo (4) that can be recapitulated in vitro (5). Ordered phosphorylation of KaiC at Thr 432 and Ser 431, as stimulated by KaiA (6) and suppressed by KaiB (7), helps set the pace of the core clock (8, 9). Genetic experiments have shown that this information is relayed to transcription machinery through signal-transduction pathways, but the standard in vitro KaiABC oscillator (5) did not provide a means to interrogate this process. Here, we report reconstitution of a clock-controlled gene regulation network in a cell-free system. This in vitro clock (IVC) includes the core KaiA, KaiB, and KaiC oscillator components, signal transduction enzymes (SasA and CikA), a transcription factor (RpaA), and a promoter-bearing DNA fragment (*PkaiBC*). We show that an IVC consisting of KaiA, KaiB, KaiC, RpaA, and SasA or CikA comprises the fundamental network needed for timekeeping, synchronization with the environment, and temporal relay to downstream events. Analysis of this network revealed steps in the clock mechanism that were not approachable previously.

Protein interactions in the IVC were monitored by real-time fluorescence anisotropy (10). KaiA, KaiB, SasA, CikA, and RpaA were fluorescently labeled using sortase-mediated ligation (11, 12). A fluorescently labeled synthetic dsDNA representing the promoter sequence of the *kaiBC* operon, *PkaiBC* (see Suppl. Mat. Table S2), was used as the RpaA target. Control experiments identified specific binding events that cause changes in the fluorescence anisotropies of each

labeled component (Suppl. Mat. Fig. S1-S3). Using a multimode microplate reader, in vitro oscillations were monitored in parallel, with each reaction containing a single fluorescently labeled protein (50 nM) in addition to unlabeled proteins KaiA, KaiB, KaiC, SasA or CikA, and RpaA at physiological concentrations (13) (see Suppl. Mat. Tables S2 and S3 for details).

5 Samples also contained either 100 nM fluorescently labeled or 100 nM unlabeled *PkaiBC* DNA. This protocol allowed measurement of the fluorescence anisotropies of each clock component and DNA in parallel reactions in a single plate and in real time over a duration of several days (Fig. 1A). The phosphorylation states of RpaA and KaiC were determined in parallel by gel electrophoresis (Suppl. Mat. Figs. S5 and S6), and the ATPase activity of KaiC was monitored in  
10 real time by <sup>1</sup>H-NMR (Suppl. Mat. Fig. S7) (14). Data were fit to a cosine function to extract periods and relative phases (see Supplementary Material). Maximal KaiC phosphorylation was referenced to circadian time (CT) 14, which is when it peaks in vivo (6), and the relative phases of the other components are compiled in Fig. 1B. CT 0 and CT 12 represent subjective dawn and dusk under constant lab conditions.

15

The relative phases of the in vitro rhythms in an IVC that contained KaiA, KaiB, KaiC, SasA, RpaA, and DNA are consistent with those reported in vivo (2). For example, fluorescence anisotropy rhythms of KaiA, KaiB, and SasA peaked around CT 15-22, indicating formation of large protein complexes during subjective night due to interactions involving KaiC (Fig. 1, Suppl. Mat. Fig. S1). In vivo these proteins are also found in large complexes around ZT 16-22  
20 (15), where ZT 0 and ZT 12 are dawn and dusk under a light-dark cycle. SasA and KaiB compete for overlapping binding sites on KaiC (16) but SasA rhythms peaked ~3 h earlier than

those of KaiB as seen in Fig. 1B. This phase difference provides a temporal window during which SasA-KaiC interactions activate SasA autophosphorylation (17) allowing phosphoryl transfer from SasA to RpaA (18). Thus, RpaA phosphorylation and DNA binding reached their peaks around subjective dusk in the IVC. This earlier binding by SasA also assists subsequent KaiB-KaiC binding, extending the range of KaiB concentrations under which the oscillator is rhythmic as detailed in an accompanying report (Heisler and Swan et. al.). The fluorescence anisotropy of RpaA increases when it dephosphorylates or interacts with SasA in the absence of KaiC but decreases when it is phosphorylated by CikA or the SasA-KaiC-EE complex (Suppl. Mat. Figs. S2 and S3), which underlies the phases of RpaA seen in Figs 1 and 2. During subjective midday the ATPase activity of KaiC peaks at 13-18 ATP/KaiC monomer per day and during subjective night decreases to a nadir of 7-8 ATP/KaiC per day, consistent with earlier studies (19). Thus, the IVC recapitulates to a reasonable extent the relative in vivo phases of the circadian clock of *S. elongatus* and enables aspects of the clock — input (20, 21), oscillator (5), output (13, 22–24) — to be queried under highly defined conditions with multiple readouts in real time.

The standard model defines SasA as the cognate kinase of RpaA that activates gene expression at dusk (25), and the circadian input kinase CikA, important for phase resetting (26) as an RpaA phosphatase at night (13, 24). However, as shown in Fig. 2, when SasA was replaced by CikA in vitro, all clock components displayed robust circadian rhythms with KaiA, KaiB, and KaiC maintaining the same relative phases as in Fig 1B. The fluorescence anisotropy of CikA peaked with that of KaiB (Fig 2), consistent with the observation that the *pseudo-receiver* domain of

CikA binds to the fold-switched state of KaiB that associates with KaiC (27). This interaction is known to stimulate the phosphatase activity of CikA (Suppl. Mat. Fig. S4) (24, 28); however, in the absence of this interaction with KaiB, CikA acts as a kinase toward RpaA (Suppl. Mat. Fig. S4) (24). Hence, CikA is bifunctional and transduces clock signals antiphasic to those of SasA by switching between phosphatase and kinase activities, which may play a role in how it resets the clock in cyanobacteria under the application of dark pulses (26). Indeed,  $\Delta sasA$  strains still generate circadian rhythms of bioluminescence in low light (25), possibly due to CikA (Suppl. Mat. Fig. S9), but  $\Delta sasA \Delta cikA$  double knockout strains are arrhythmic (29).

The IVC can provide insights into biological questions previously unapproachable by genetic studies, such as how clock control over RpaA regulates promoter activity. An *S. elongatus* strain expressing a single nucleotide polymorphism in an *rpaA* allele (originally reported as a *crm1* mutant (30)) resulted in an R121Q amino acid substitution and did not produce rhythmic gene expression despite having a wild-type RpaA phosphorylation pattern (Suppl. Mat. Fig. S10). This arrhythmic allele *rpaA-R121Q* was reconstructed in a wild-type reporter strain (Fig. 3A) by markerless CRISPR-Cas12a editing (31). The particular transcription-activation step disrupted by the R121Q substitution in RpaA could not be predicted *a priori* (32). Using the IVC, we found that the RpaA R121Q mutant displays circadian rhythms of fluorescence anisotropy (Suppl. Mat. Fig. S11) and phosphorylation (Fig. 3B and Suppl. Mat. Fig. S12) like WT RpaA. However, the RpaA R121Q mutant bound the *PkaiBC* promoter poorly as indicated by the low amplitude of DNA fluorescence anisotropy rhythms. Thus, while the R121Q amino acid substitution in RpaA does not hinder its interactions with SasA or CikA, the signal is not

transduced normally to the DNA-binding domain, possibly by blocking phosphorylation-dependent oligomerization (33).

This extended in vitro clock is an autonomously oscillating system that remains phase coherent  
5 for several days without user intervention, allowing observation of rhythmic behaviors of several clock components simultaneously, including interactions with a promoter element on DNA.

Complementing this assay with parallel measurements of phosphorylation and ATPase activities rounds out a moving picture of an intact cyanobacterial clock. The IVC now makes it possible to  
10 ask questions about how changing environments, such as temperature, metabolites, and protein levels are reflected in the core oscillator and propagated to regulation of transcription, providing deeper mechanistic insights into clock biology.

## References and Notes:

1. P. J. D. Jay C. Dunlap, Jennifer J. Loros, *Chronobiology : biological timekeeping* (2004).
2. S. E. Cohen, S. S. Golden, *Circadian Rhythms in Cyanobacteria. Microbiol. Mol. Biol. Rev.* (2015), doi:10.1128/mmbr.00036-15.
- 5 3. M. Ishiura, S. Kutsuna, S. Aoki, H. Iwasaki, C. R. Andersson, A. Tanabe, S. S. Golden, C. H. Johnson, T. Kondo, *Expression of a gene cluster kaiABC as a circadian feedback process in cyanobacteria* (1998).
4. J. Tomita, M. Nakajima, T. Kondo, H. Iwasaki, “No Transcription-Translation Feedback in Circadian Rhythm of KaiC Phosphorylation,” (available at  
10 <http://science.sciencemag.org/>).
5. M. Nakajima, K. Imai, H. Ito, T. Nishiwaki, Y. Murayama, H. Iwasaki, T. Oyama, T. Kondo, Reconstitution of circadian oscillation of cyanobacterial KaiC phosphorylation in vitro. *Science* (80-. ). (2005), doi:10.1126/science.1108451.
6. H. Iwasaki, T. Nishiwaki, Y. Kitayama, M. Nakajima, T. Kondo, KaiA-stimulated KaiC  
15 phosphorylation in circadian timing loops in cyanobacteria. *Proc. Natl. Acad. Sci. U. S. A.* (2002), doi:10.1073/pnas.222467299.
7. Y. Kitayama, H. Iwasaki, T. Nishiwaki, T. Kondo, KaiB functions as an attenuator of KaiC phosphorylation in the cyanobacterial circadian clock system. *EMBO J.* (2003), doi:10.1093/emboj/cdg212.
- 20 8. M. J. Rust, J. S. Markson, W. S. Lane, D. S. Fisher, E. K. O’Shea, Ordered phosphorylation governs oscillation of a three-protein circadian clock. *Science* (80-. ). (2007), doi:10.1126/science.1148596.
9. T. Nishiwaki, Y. Satomi, Y. Kitayama, K. Terauchi, R. Kiyohara, T. Takao, T. Kondo, A sequential program of dual phosphorylation of KaiC as a basis for circadian rhythm in  
25 cyanobacteria. *EMBO J.* (2007), doi:10.1038/sj.emboj.7601832.
10. J. Heisler, A. Chavan, Y.-G. Chang, A. LiWang, Real-Time In Vitro Fluorescence Anisotropy of the Cyanobacterial Circadian Clock. *Methods Protoc.* (2019), doi:10.3390/mps2020042.



11. C. S. Theile, M. D. Witte, A. E. M. Blom, L. Kundrat, H. L. Ploegh, C. P. Guimaraes, Site-specific N-terminal labeling of proteins using sortase-mediated reactions. *Nat. Protoc.* (2013), doi:10.1038/nprot.2013.102.
12. C. P. Guimaraes, M. D. Witte, C. S. Theile, G. Bozkurt, L. Kundrat, A. E. M. Blom, H. L. Ploegh, Site-specific C-terminal and internal loop labeling of proteins using sortase-mediated reactions. *Nat. Protoc.* (2013), doi:10.1038/nprot.2013.101.
13. J. S. Markson, J. R. Piechura, A. M. Puszynska, E. K. O'Shea, Circadian control of global gene expression by the cyanobacterial master regulator RpaA. *Cell* (2013), doi:10.1016/j.cell.2013.11.005.
14. B. Guo, P. S. Gurel, R. Shu, H. N. Higgs, M. Pellegrini, D. F. Mierke, Monitoring ATP hydrolysis and ATPase inhibitor screening using <sup>1</sup>H NMR. *Chem. Commun.* (2014), doi:10.1039/c4cc04399e.
15. H. Kageyama, T. Kondo, H. Iwasaki, Circadian formation of clock protein complexes by KaiA, KaiB, KaiC, and SasA in cyanobacteria. *J. Biol. Chem.* (2003), doi:10.1074/jbc.M208899200.
16. R. Tseng, Y. G. Chang, I. Bravo, R. Latham, A. Chaudhary, N. W. Kuo, A. Liwang, Cooperative KaiA-KaiB-KaiC interactions affect KaiB/SasA competition in the circadian clock of cyanobacteria. *J. Mol. Biol.* (2014), doi:10.1016/j.jmb.2013.09.040.
17. R. M. Smith, S. B. Williams, Circadian rhythms in gene transcription imparted by chromosome compaction in the cyanobacterium *Synechococcus elongatus*. *Proc. Natl. Acad. Sci. U. S. A.* (2006), doi:10.1073/pnas.0508696103.
18. N. Takai, M. Nakajima, T. Oyama, R. Kito, C. Sugita, M. Sugita, T. Kondo, H. Iwasaki, A KaiC-associating SasA-RpaA two-component regulatory system as a major circadian timing mediator in cyanobacteria. *Proc. Natl. Acad. Sci.* (2006), doi:10.1073/pnas.0602955103.
19. K. Terauchi, Y. Kitayama, T. Nishiwaki, K. Miwa, Y. Murayama, T. Oyama, T. Kondo, ATPase activity of KaiC determines the basic timing for circadian clock of cyanobacteria. *Proc. Natl. Acad. Sci. U. S. A.* **104**, 16377–16381 (2007).
20. M. J. Rust, S. S. Golden, E. K. O'Shea, Light-driven changes in energy metabolism

- directly entrain the cyanobacterial circadian oscillator. *Science* (80-. ). (2011), doi:10.1126/science.1197243.
21. Y. I. Kim, D. J. Vinyard, G. M. Ananyev, G. C. Dismukes, S. S. Golden, Oxidized quinones signal onset of darkness directly to the cyanobacterial circadian oscillator. *Proc. Natl. Acad. Sci. U. S. A.* (2012), doi:10.1073/pnas.1216401109.
- 5
22. M. L. Paddock, J. S. Boyd, D. M. Adin, S. S. Golden, Active output state of the *Synechococcus Kai* circadian oscillator. *Proc. Natl. Acad. Sci. U. S. A.* (2013), doi:10.1073/pnas.1315170110.
23. Y. Taniguchi, N. Takai, M. Katayama, T. Kondo, T. Oyama, Three major output pathways from the KaiABC-based oscillator cooperate to generate robust circadian kaiBC expression in cyanobacteria. *Proc. Natl. Acad. Sci. U. S. A.* (2010), doi:10.1073/pnas.0909924107.
- 10
24. A. Gutu, E. K. O’Shea, Two Antagonistic Clock-Regulated Histidine Kinases Time the Activation of Circadian Gene Expression. *Mol. Cell* (2013), doi:10.1016/j.molcel.2013.02.022.
- 15
25. H. Iwasaki, S. B. Williams, Y. Kitayama, M. Ishiura, S. S. Golden, T. Kondo, A KaiC-interacting sensory histidine kinase, SasA, necessary to sustain robust circadian oscillation in cyanobacteria. *Cell* (2000), doi:10.1016/S0092-8674(00)80832-6.
26. O. Schmitz, M. Katayama, S. B. Williams, T. Kondo, S. S. Golden, CikA, a bacteriophytochrome that resets the cyanobacterial circadian clock. *Science* (80-. ). (2000), doi:10.1126/science.289.5480.765.
- 20
27. R. Tseng, N. F. Goularte, A. Chavan, J. Luu, S. E. Cohen, Y.-G. Chang, J. Heisler, S. Li, A. K. Michael, S. Tripathi, S. S. Golden, A. LiWang, C. L. Partch, Structural basis of the day-night transition in a bacterial circadian clock. *Science* (80-. ). **355**, 1174–1180 (2017).
28. Y. G. Chang, S. E. Cohen, C. Phong, W. K. Myers, Y. I. Kim, R. Tseng, J. Lin, L. Zhang, J. S. Boyd, Y. Lee, S. Kang, D. Lee, S. Li, R. D. Britt, M. J. Rust, S. S. Golden, A. Li Wang, A protein fold switch joins the circadian oscillator to clock output in cyanobacteria. *Science* (80-. ). (2015), doi:10.1126/science.1260031.
- 25
29. Y. Taniguchi, N. Takai, M. Katayama, T. Kondo, T. Oyama, Three major output pathways

from the KaiABC-based oscillator cooperate to generate robust circadian kaiBC expression in cyanobacteria. *Proc. Natl. Acad. Sci.* (2010), doi:10.1073/pnas.0909924107.

30. J. S. Boyd, J. R. Bordowitz, A. C. Bree, S. S. Golden, An allele of the *crm* gene blocks cyanobacterial circadian rhythms. *Proc. Natl. Acad. Sci. U. S. A.* (2013), doi:10.1073/pnas.1312793110.

5

31. J. Ungerer, H. B. Pakrasi, Cpf1 Is A Versatile Tool for CRISPR Genome Editing Across Diverse Species of Cyanobacteria. *Sci. Rep.* (2016), doi:10.1038/srep39681.

32. L. A. Pratt, T. J. Silhavy, OmpR mutants specifically defective for transcriptional activation. *J. Mol. Biol.* (1994), doi:10.1016/0022-2836(94)90033-7.

10

33. F. Trajtenberg, D. Albanes, N. Ruétalo, H. Botti, A. E. Mechaly, M. Nieves, P. S. Aguilar, L. Cybulski, N. Larrieux, D. De Mendoza, A. Buschiazzo, Allosteric activation of bacterial response regulators: The role of the cognate histidine kinase beyond phosphorylation. *MBio* (2014), doi:10.1128/mBio.02105-14.

15

**Acknowledgments:** We thank Joel Heisler, Jeffery Swan, Gary Chow, Yong-gang Chang, Michael Rust, Lu Hong, Shahar Sukenik, and Maria Zoghbi for helpful discussions. We also thanks to David Rice for maintaining the NMR Facility, and Steve Grimaldi for maintaining the NMR cryoplatfrom.

5

**Funding:**

This work was supported by US National Institutes of Health grants R01GM107521 (to A.L.), R01GM121507 (to C.L.P.) and R35GM118290 (to S.S.G.).

10

**Author contributions:**

A.L., A.G.C., D.C.E., M.F., C.S., C.L.P. and S.S.G. designed the experiments, and contributed reagents. A.G.C., D.E., M. F. and C. S. performed the experiments. Data were analyzed by A.G.C., A.L., D.E., M.F., C. S., C.L.P., and S.S.G. A.G.C., A.L., C.L.P., and S.S.G. wrote the paper. All authors approve of the conclusions and final version of the paper.

15

**Competing interests:**

Authors declare no competing interests.

**Data and materials availability:**

All data are available in the main text or the supplementary materials.

20

**Supplementary Materials:**

Materials and Methods

Figures S1-S12

Tables S1-S4

References (1-11)

25

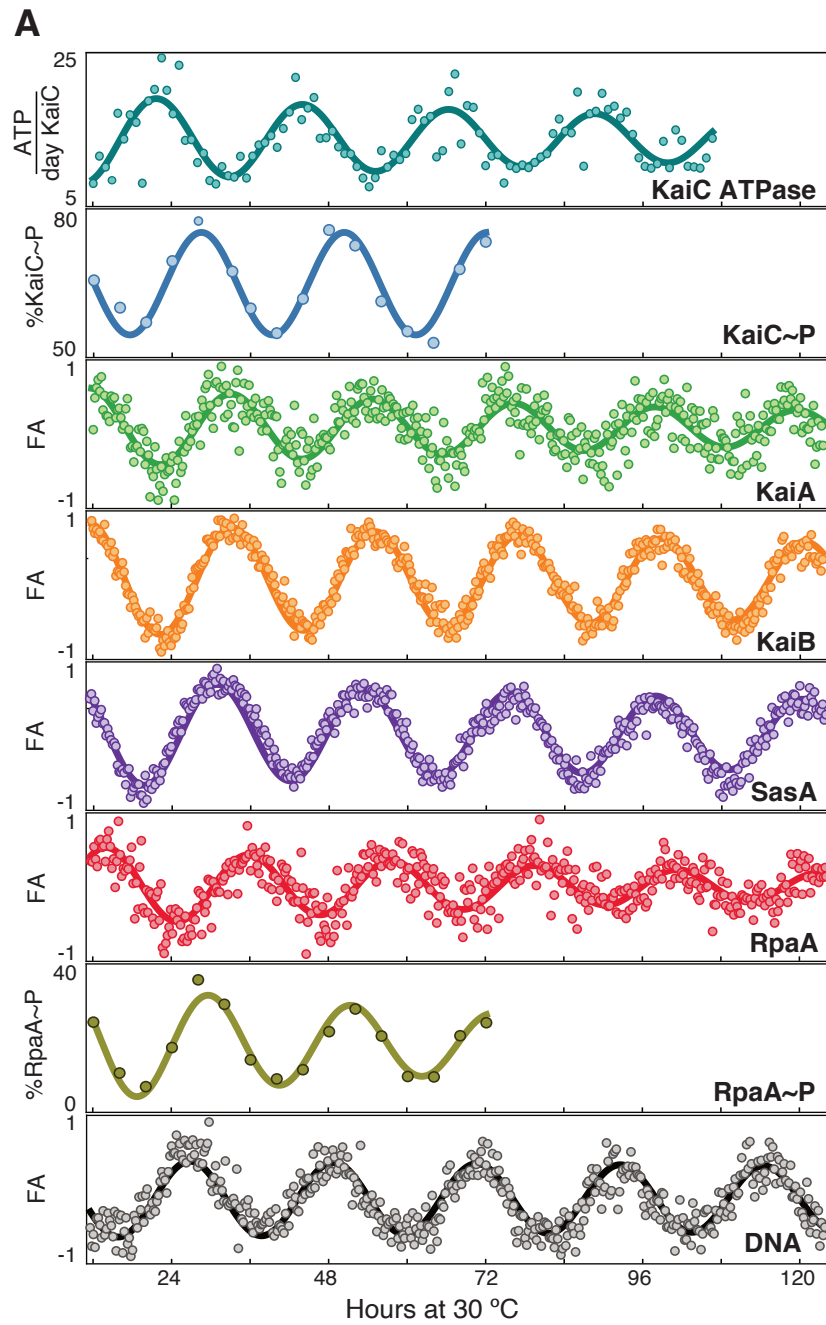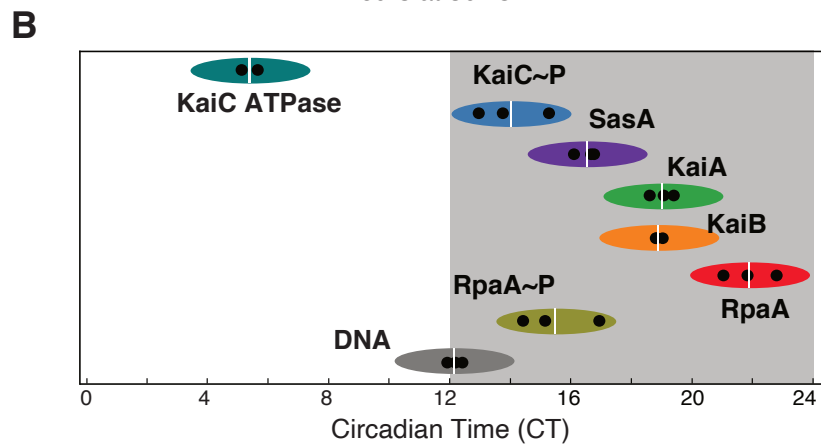

**Fig. 1. Reconstitution of an intact clock that controls DNA binding in vitro.** (A) Clock

reactions containing KaiA, KaiB, KaiC, SasA RpaA, DNA (*PkaiBC*), 1 mM ATP, and 5 mM

MgCl<sub>2</sub> were reconstituted in vitro. Fluorescence anisotropies (FA) for 50 nM probe KaiA

(green), KaiB (orange), SasA (purple), RpaA (red) and 100 nM *PkaiBC* (gray), were measured in

5 a microplate reader at 30 °C. For phosphorylation experiments 8 µL aliquots were collected

every 4 hours and flash frozen in liquid N<sub>2</sub>, followed by gel electrophoresis. KaiC~P (blue) was

analyzed on 7.5% SDS-PAGE and RpaA~P (olive) on 12.5% Zn<sup>2+</sup>-Phos-tag<sup>TM</sup> gels. KaiC-

ATPase (teal) activity was measured by real-time <sup>1</sup>H-NMR in a KaiABC-only reaction to isolate

the KaiC ATPase activity. After truncating the first 12 hours of data collection during which

10 samples approached stable limit cycles, data were baseline-corrected (filled circles) and fit to a

cosine function (solid lines) to calculate periods and phases (see Materials and Methods).

Fluorescence data were also normalized before fitting. (B) Relative phases of each component

determined from three separate experiments (determined from cosine fits of data in (A)) are

shown by black dots with the average denoted by a white vertical line. Peak of KaiC~P is

15 referenced to CT = 14 (14). The width of ellipses represents ≥80% peak height.

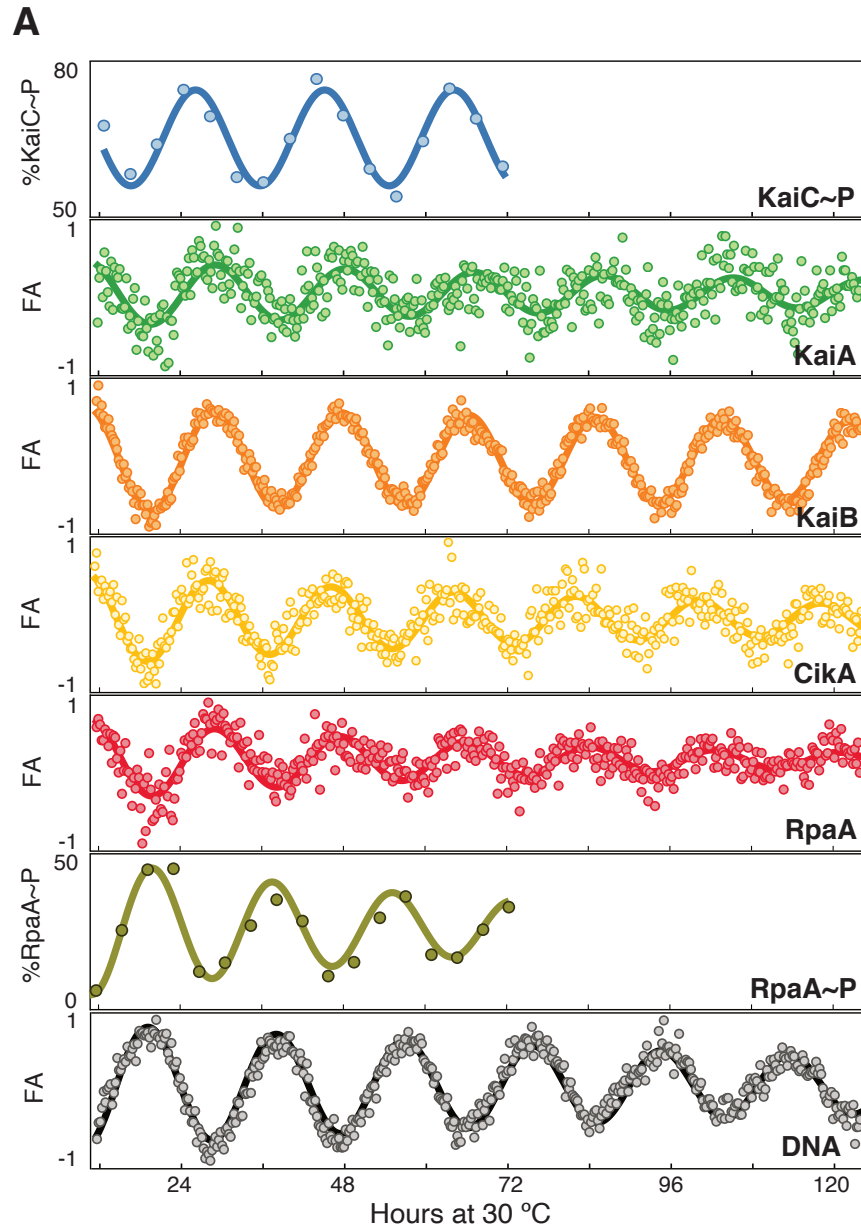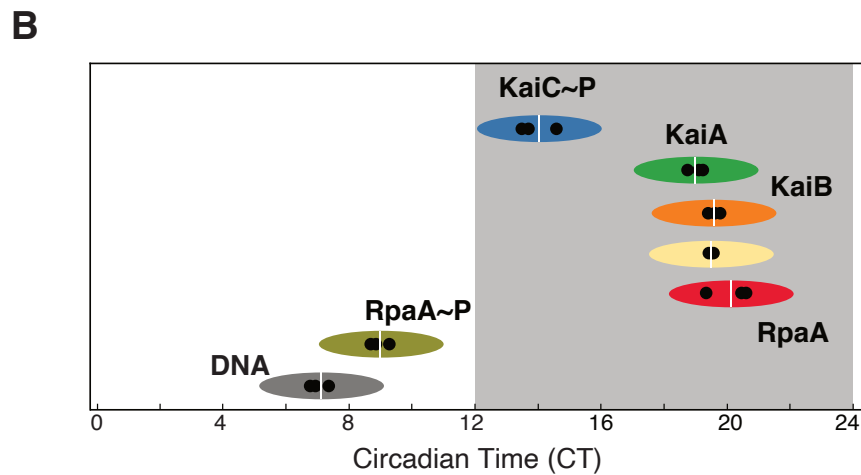

**Fig. 2. CikA transmits time signals downstream in the absence of SasA. (A)** Fluorescence anisotropy rhythms of 50nM probe, KaiA (green), KaiB (orange), CikA (gold), RpaA (red), and 100 nM DNA (*PkaiBC*, gray) are shown along with KaiC~P (blue) and RpaA~P (olive) measured in clock reactions similar to those in Fig. 1A, but with CikA replacing SasA. **(B)** Relative phases of KaiC~P, KaiA, and KaiB remain unchanged, while DNA peaks at midday (CT 7) instead of dusk (CT 12).



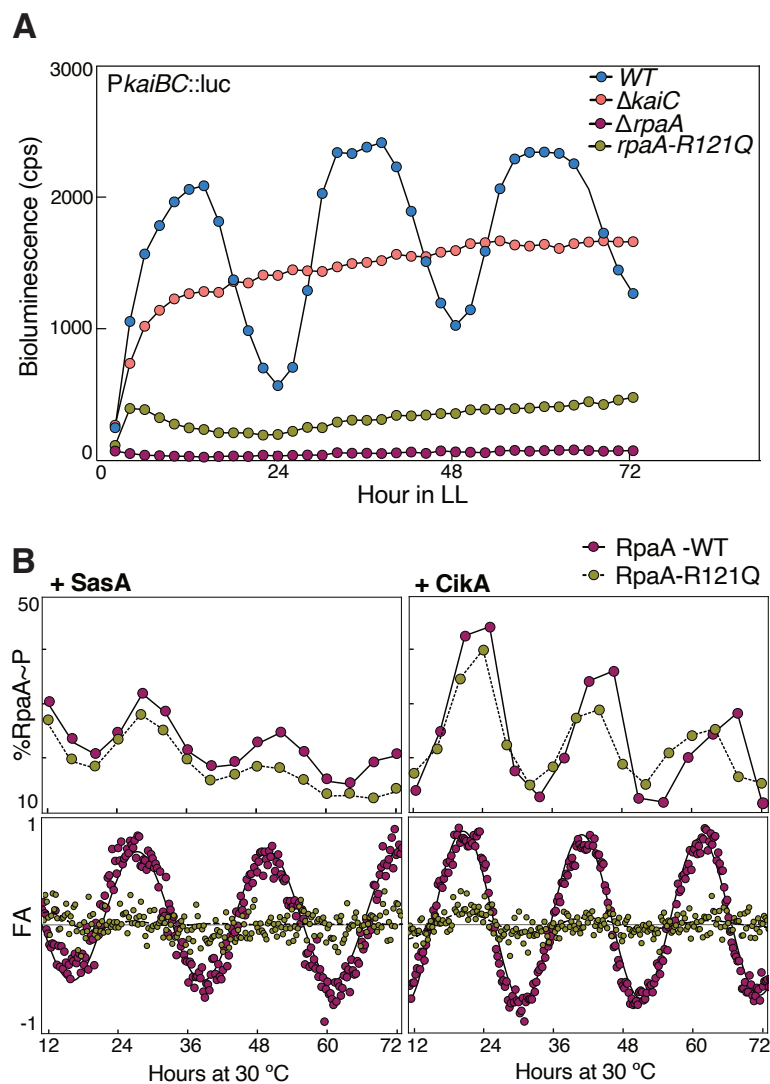

**Fig. 3. IVC explains why RpaA-R121Q mutant produces arrhythmic gene expression in**

**cyanobacteria. (A)** Rhythms of bioluminescence generated by *PkaiBC::luc* expression were

5

monitored for entrained wild-type (blue),  $\Delta kaiC$  (pink),  $\Delta rpaA$  (maroon) and *rpaA-R121Q*

(olive) cyanobacterial strains. Each plot represents an average of six biological replicates. **(B)**

Top panels: Phosphorylation rhythms are for WT RpaA (maroon dots) and RpaA-R121Q mutant

(olive dots) in in vitro reactions containing either SasA (left) or CikA (right). Bottom panels:

Fluorescence anisotropy rhythms of DNA (*PkaiBC*) in the presence of WT RpaA (maroon dots)

or RpaA-R121Q mutant (olive dots).

10
